# Supplementary material for: Implementing the Collaborative Chronic Care Model in Mental Health Clinics: Achieving and Sustaining Clinical Effects
Source: Atypon-hosted journal article supplement (doi:10.1176/appi.ps.202000117), 2021-03-18
Supplement: appi.ps.202000117.ds001.pdf [file appi.ps.202000117.ds001.pdf]

 


Psychiatry Online
