# Supplementary material for: Implementing the Collaborative Chronic Care Model in Mental Health Clinics: Achieving and Sustaining Clinical Effects
Source: Atypon-hosted journal article supplement (doi:10.1176/appi.ps.202000117), 2021-03-18
Supplement: appi.ps.202000117.ds001.pdf [file appi.ps.202000117.ds001.pdf]

**e-Table: Demographic and clinical characteristics for populations treated by CCM-implementing and non-CCM clinics for Analysis 1 and Analysis 2**

| Demographic and clinical characteristics         | Analysis 1 populations              |                         |                             |                         |                          | Analysis 2 populations              |                         |                             |                         |                          |
|--------------------------------------------------|-------------------------------------|-------------------------|-----------------------------|-------------------------|--------------------------|-------------------------------------|-------------------------|-----------------------------|-------------------------|--------------------------|
|                                                  | CCM-implementing clinics<br>n=5,596 |                         | Non-CCM clinics<br>N=46,755 |                         | Effect Size <sup>a</sup> | CCM-implementing clinics<br>N=4,230 |                         | Non-CCM clinics<br>N=49,818 |                         | Effect Size <sup>a</sup> |
|                                                  | Mean or N                           | Standard deviation or % | Mean or N                   | Standard deviation or % |                          | Mean or N                           | Standard deviation or % | Mean or N                   | Standard deviation or % |                          |
| Age                                              | 52.2                                | 14.5                    | 53.3                        | 14.7                    | 0.01                     | 53.9                                | 14.5                    | 54.0                        | 14.9                    | 0.00                     |
| Female sex                                       | 881                                 | 15.7%                   | 6,415                       | 13.7%                   | 0.02                     | 606                                 | 14.3%                   | 6,964                       | 14.0%                   | 0.01                     |
| Minority                                         | 1,725                               | 31.3%                   | 15,353                      | 33.4%                   | 0.01                     | 1,346                               | 32.5%                   | 16,527                      | 34.0%                   | 0.01                     |
| Married                                          | 2,602                               | 46.8%                   | 22,239                      | 47.8%                   | 0.01                     | 1,937                               | 46.4%                   | 24,065                      | 49.0%                   | 0.01                     |
| Rural residence                                  | 1,205                               | 21.6%                   | 14,905                      | 31.9%                   | 0.07                     | 818                                 | 19.5%                   | 15,541                      | 31.5%                   | 0.10                     |
| VA disability $\geq 50\%$ <sup>b</sup>           | 4,338                               | 77.5%                   | 36,188                      | 77.4%                   | 0.01                     | 3,256                               | 77.5%                   | 38,499                      | 78.0%                   | 0.01                     |
| Number of active mental health diagnoses         | 2.3                                 | 1.3                     | 2.0                         | 1.3                     | 0.01                     | 2.1                                 | 1.1                     | 1.8                         | 1.2                     | 0.01                     |
| Mental health hospitalization in the prior year? | 248                                 | 4.4%                    | 1,987                       | 4.3%                    | 0.01                     | 114                                 | 2.7%                    | 1,738                       | 3.5%                    | 0.01                     |
| Number of active medical-surgical diagnoses      | 1.1                                 | 1.3                     | 1.0                         | 1.2                     | 0.00                     | 1.0                                 | 1.2                     | 1.0                         | 1.2                     | 0.00                     |

<sup>a</sup> Cramer’s V for categorical variables and eta-squared for continuous variables; see Methods section for details

<sup>b</sup> Department of Veterans Affairs rates disability level 0-100% reflecting the degree of functional impairment associated with service-connected conditions.
